# Supplementary material for: Correlation between serum 1,25-dihydroxyvitamin D and 25-hydroxyvitamin D in response to analytical procedures; a systematic review and meta-analysis
Source: publisher site journal article supplement (doi:10.1515/tjb-2023-0258), 2024-05-10
Supplement: Supplementary file 1 [file j_tjb-2023-0258_suppl_001.pdf]

| No | Brand                                                     | FDA approved | CDC VDSCP      | Metod       | References                                                          | Proces    | Sample                         | Specifity                                  | Detection L                         | Assay Range ( |
|----|-----------------------------------------------------------|--------------|----------------|-------------|---------------------------------------------------------------------|-----------|--------------------------------|--------------------------------------------|-------------------------------------|---------------|
| 1  | IDS- 25 VitDS Immunoassay                                 | Approved     | Certified      | CLIA        | <a href="https://www.idsplc.com/pr">https://www.idsplc.com/pr</a>   | Automated | Serum and Plasma               | 25(OH)D2 and 25(OH)D3                      |                                     | 4.0-110       |
| 2  | IDS-iSYS 25VitDS CLIA                                     | Approved     | Previously cer | CLIA        | <a href="https://www.accessdata.fda">https://www.accessdata.fda</a> | Automated | Serum or Plasma (EDTA/Heparin) |                                            | LoB: 1.31<br>LoD: 1.98<br>LoQ: 3.53 | 4.0-110       |
| 3  | IDS- 25-Hydroxy Vitamin Ds EIA Immunoassay                | Approved     | Certified      | EIA         | <a href="https://www.accessdata.fda">https://www.accessdata.fda</a> | Manual    | Serum or Plasma (EDTA/Heparin) | 25(OH)D2 and 25(OH)D3                      | LoB: 1.3<br>LoD: 2.7<br>LoQ: 4.8    | 6.5-100       |
| 4  | IDS- 25-Hydroxy Vitamin D RIA Immunoassay                 | Approved     | Not available  | RIA         | <a href="https://www.idsplc.com/pr">https://www.idsplc.com/pr</a>   | Manual    | Serum or Plasma (EDTA/Heparin) | 25(OH)D and other hydroxylated metabolites |                                     | 0 - 160       |
| 5  | Diasorin LIAISON® 25 OH Vitamin D Total assay             | Approved     | Certified      | Competitive | <a href="https://www.accessdata.fda">https://www.accessdata.fda</a> | Automated | Serum                          | 25(OH)D2 and 25(OH)D3                      | LoD:2.0<br>LoQ: 4.0                 | 4.0 - 150     |
| 6  | Diasorin (formerly Incstar)- 25-Hydroxyvitamin D 125i RIA | Approved     | Not available  | RIA         | <a href="https://www.accessdata.fda">https://www.accessdata.fda</a> | Automated | Serum and Plasma               |                                            |                                     |               |

|   |                                                                                                |               |               |       |                                                                             |           |                  |                       |                                     |           |
|---|------------------------------------------------------------------------------------------------|---------------|---------------|-------|-----------------------------------------------------------------------------|-----------|------------------|-----------------------|-------------------------------------|-----------|
| 7 | DIAsource 25OH Vitamin D Total-RIA-CT                                                          | Not available | Not available | RIA   | <a href="https://www.ibl-america.com">https://www.ibl-america.com</a>       | Manual    | Serum            | 25(OH)D2 and 25(OH)D3 | LoB: 0.8<br>LoD: 1.9<br>LoQ: 2.6    | 0/5.8-100 |
| 8 | DIAsource- Total 25OH Vitamin D ELISA                                                          | Approved      | Certified     | ELISA | <a href="https://www.accessdata.fda.gov">https://www.accessdata.fda.gov</a> | Manual    | Serum            | 25(OH)D2 and 25(OH)D3 | LoB: 1.69<br>LoD: 2.81<br>LoQ: 4.32 | 7.7-122.9 |
| 9 | Access 25(OH) Vitamin D Total Assay for use on the UniCel DxI 9000 Access Immunoassay Analyzer | Approved      | Not available | CLIA  | <a href="https://www.accessdata.fda.gov">https://www.accessdata.fda.gov</a> | Automated | Serum and Plasma | 25(OH)D2 and 25(OH)D3 | LoB: 2.5<br>LoD: 4.5<br>LoQ: 7.0    | 7-120     |

|    |                                                                                 |          |               |                   |                                                                                                                                                                                                                                                                                                                               |           |                  |                       |                                   |        |
|----|---------------------------------------------------------------------------------|----------|---------------|-------------------|-------------------------------------------------------------------------------------------------------------------------------------------------------------------------------------------------------------------------------------------------------------------------------------------------------------------------------|-----------|------------------|-----------------------|-----------------------------------|--------|
| 10 | Access 25 (OH) Vitamin D<br>Total for use on the Access 2<br>Immunoassay System | Approved | Not available | CLIA              | <a href="https://www.accessdata.fda.gov/cdrh/devices/d110001/Abbott%20Diabetes%20Care%20Systems%20LLC%20Access%202%20OH%20Vitamin%20D%20Immunoassay%20System.pdf">https://www.accessdata.fda.gov/cdrh/devices/d110001/Abbott%20Diabetes%20Care%20Systems%20LLC%20Access%202%20OH%20Vitamin%20D%20Immunoassay%20System.pdf</a> | Automated | Serum and Plasma | 25(OH)D2 and 25(OH)D3 | LoB: 0.55<br>LoD: 1.0<br>LoQ: 3.0 | 7-120  |
| 11 | ARCHITECT 25-OH<br>Vitamin D assay                                              | Approved | Certified     | Chemiluminescence | <a href="https://www.accessdata.fda.gov/cdrh/devices/d110001/Abbott%20Diabetes%20Care%20Systems%20LLC%20Access%202%20OH%20Vitamin%20D%20Immunoassay%20System.pdf">https://www.accessdata.fda.gov/cdrh/devices/d110001/Abbott%20Diabetes%20Care%20Systems%20LLC%20Access%202%20OH%20Vitamin%20D%20Immunoassay%20System.pdf</a> | Automated | Serum and Plasma | 25(OH)D2 and 25(OH)D3 | LoB: 1.9<br>LoD: 3.1<br>LoQ: 8.0  | 13- 96 |

|    |                                    |          |           |                   |                                                                                                                                                                         |           |                                |                       |                                  |           |
|----|------------------------------------|----------|-----------|-------------------|-------------------------------------------------------------------------------------------------------------------------------------------------------------------------|-----------|--------------------------------|-----------------------|----------------------------------|-----------|
| 12 | ARCHITECT 25-OH Vitamin D 5P02     | Approved | Certified | Chemiluminescence | <a href="https://www.accessdata.fda.gov/drugsatfda_docs/CDER/2017/171221Orig1s001.pdf">https://www.accessdata.fda.gov/drugsatfda_docs/CDER/2017/171221Orig1s001.pdf</a> | Automated | Serum or Plasma (EDTA/Heparin) | 25(OH)D2 and 25(OH)D3 | LoB: 1.6<br>LoD: 2.2<br>LoQ: 2.4 | 3.4–155.9 |
| 13 | Cobas Elecsys® Vitamin D total III | Approved | Certified | ECL binding       | <a href="https://www.accessdata.fda.gov/drugsatfda_docs/CDER/2017/171221Orig1s001.pdf">https://www.accessdata.fda.gov/drugsatfda_docs/CDER/2017/171221Orig1s001.pdf</a> | Automated | Serum or Plasma                | 25(OH)D2 and 25(OH)D3 | LoB: 1.6<br>LoD: 2.8<br>LoQ: 5.1 | 6-120     |

|    |                                                     |               |               |      |                                                                                                                                                   |           |                                      |                       |                                     |          |
|----|-----------------------------------------------------|---------------|---------------|------|---------------------------------------------------------------------------------------------------------------------------------------------------|-----------|--------------------------------------|-----------------------|-------------------------------------|----------|
| 14 | Siemens Dimension EXL<br>LOCI Vitamin D Total Assay | Approved      | Not available | CLIA | <a href="https://www.accessdata.fda.gov/cdlr/devices/2014/CDLR140010">https://www.accessdata.fda.gov/cdlr/devices/2014/CDLR140010</a>             | Automated | Serum or<br>Plasma<br>(EDTA/Heparin) | 25(OH)D2 and 25(OH)D3 | LoB: 0.8<br>LoD: 1.3<br>LoQ: 5.0    | 5-150    |
| 15 | Siemens Advia Centaur<br>Vitamin D Total Assay      | Approved      | Not available | CLIA | <a href="https://www.accessdata.fda.gov/cdlr/devices/2014/CDLR140010">https://www.accessdata.fda.gov/cdlr/devices/2014/CDLR140010</a>             | Automated | Serum or<br>Plasma<br>(EDTA/Heparin) | 25(OH)D2 and 25(OH)D3 | LoB: 1.6<br>LoD: 3.3<br>LoQ: 4.2    | 4.2-150  |
| 16 | Siemens Atellica IM Vitamin<br>D Total Assay        | Not available | Certified     | CLIA | <a href="https://www.siemens-healthineers.com/clinical-testing/immunoassay">https://www.siemens-healthineers.com/clinical-testing/immunoassay</a> | Automated | Serum                                | 25(OH)D2 and 25(OH)D3 | LoQ: 2.73                           | 4.2-150  |
| 17 | Maglumi 2000 25-Oh<br>Vitamin D                     | Approved      | Certified     | CLIA | <a href="https://www.accessdata.fda.gov/cdlr/devices/2014/CDLR140010">https://www.accessdata.fda.gov/cdlr/devices/2014/CDLR140010</a>             | Automated | Serum                                |                       | LoB: 1.99<br>LoD: 3.80<br>LoQ: 5.37 | 5.37-143 |

|    |                                                                    |               |               |          |                                                                                                                                                                     |           |                                                            |                                                     |                        |                                                                                     |
|----|--------------------------------------------------------------------|---------------|---------------|----------|---------------------------------------------------------------------------------------------------------------------------------------------------------------------|-----------|------------------------------------------------------------|-----------------------------------------------------|------------------------|-------------------------------------------------------------------------------------|
| 18 | Nichols Advantage 25-Hydroxyvitamin D                              | Approved      | Not available | RIA      | <a href="https://www.accessdata.fda.gov/drugsatfda_docs/nda/2015/014174Orig1s01.pdf">https://www.accessdata.fda.gov/drugsatfda_docs/nda/2015/014174Orig1s01.pdf</a> | Automated | Serum or Plasma                                            | 25(OH) vitamin D and other hydroxylated metabolites | LoD: 4.0<br>LoQ: 7.0   | 7-120                                                                               |
| 19 | Sunlong Biotech- Human 25-hydroxy vitaminD3(25-OH-D3) ELISA        | Not available | Not available | ELISA    | <a href="https://www.sunlongbiotech.com/">https://www.sunlongbiotech.com/</a>                                                                                       | Manual    | Serum, Plasma (EDTA or citrate), Urine, Cell Culture Media |                                                     | Sensitivity: 0.1 ng/mL | 0.5-40 ng/mL                                                                        |
| 20 | MassChrom® 25-OHD3/D2 in Serum/Plasma - LC-MS/MS                   | Not available | Not available | LC-MS/MS | <a href="https://chromsystems.com/">https://chromsystems.com/</a>                                                                                                   | Automated | Serum and Plasma                                           |                                                     |                        | 25(OH)D3: 1.0 - 250 µg/l<br>25(OH)D2: 1.0 - 250 µg/l                                |
| 21 | MassChrom® 25-OHD3/D2 and 3-epi-25-OHD3 in Serum/Plasma - LC-MS/MS | Not available | Not available | LC-MS/MS | <a href="https://chromsystems.com/">https://chromsystems.com/</a>                                                                                                   | Automated | Serum and Plasma                                           |                                                     |                        | 25(OH)D3: 1.5- 250 µg/l<br>25(OH)D2: 1.5- 250 µg/l<br>3-epi-25(OH)D3: 1.5- 250 µg/l |

| No | Brand                                                    | Intraassay | Interassay | Total/Inter | Cross reactivity                                                                                                                                                                                                                                                                                                                                                | Standardisation                                                                                                                                                                                                                                                                                                                                                                                                                                                                                                                                                                                                                                                            |
|----|----------------------------------------------------------|------------|------------|-------------|-----------------------------------------------------------------------------------------------------------------------------------------------------------------------------------------------------------------------------------------------------------------------------------------------------------------------------------------------------------------|----------------------------------------------------------------------------------------------------------------------------------------------------------------------------------------------------------------------------------------------------------------------------------------------------------------------------------------------------------------------------------------------------------------------------------------------------------------------------------------------------------------------------------------------------------------------------------------------------------------------------------------------------------------------------|
| 1  | IDS- 25 VitDS Immunoassay                                |            |            |             |                                                                                                                                                                                                                                                                                                                                                                 | ID-LCMS/MS Reference Method Procedure                                                                                                                                                                                                                                                                                                                                                                                                                                                                                                                                                                                                                                      |
| 2  | IDS-iSYS 25VitDS CLIA                                    | 3.2-5.2    |            | 6.4-9.4     | 101% for 25(OH)D3 (20 ng/mL)<br>105% for 25(OH)D2 (20 ng/mL)<br>197% for 24,25 (OH)2D3 (25 ng/mL)<br>37% for 24,25 (OH)2D2 (25 ng/mL)<br>3% for 1,25 (OH)2D3 (20 ng/mL)<br>8% for 1,25 (OH)2D2 (20 ng/mL)<br>0% for 3-epi-25-(OH)D3 (100 ng/mL)                                                                                                                 | The IDS-iSYS 25 VitDS assay is traceable to the Ghent University isotope dilutionliquid chromatography/tandem mass spectrometry (ID-LCMS/MS) 25(OH)D Reference Method Procedure (RMP). The ID-LCMS/MS RMP is further traceable to the National Institute of Standards and Technology Standard Reference Material (NIST SRM) 2972. This assay has been standardized in accordance with the Vitamin D Standarization Program (VDSP). To achieve standardization, the IDS iSYS 25 VitDS assay master calibration parameters were aligned to the VDSP by using 136 single-donor human serum samples from the VSDP program, which were value assigned using the ID-LCMS/MS RMP. |
| 3  | IDS- 25-Hydroxy Vitamin Ds EIA Immunoassay               | 1.9-3.7    |            | 3.7-11.5    | 95% for 25(OH)D3 (10-20 ng/mL)<br>109% for 25(OH)D2 (10-20 ng/mL)<br>91% for 24,25 (OH)2D3 (4-6 ng/mL)<br>5% for 1,25 (OH)2D3 (2 ng/mL)<br>84% for 1,25 (OH)2D2 (20 ng/mL)<br>-1% for 3-epi-25-(OH)D3 (100 ng/mL)<br>-1% for 3-epi-25-(OH)D2 (100 ng/mL)<br>17% for Paricalcitol (100 ng/mL)<br>0% for Vitamin D3 (1000 ng/mL)<br>6% for Vitamin D2 (100 ng/mL) | The 25-Hydroxy Vitamin DS EIA assay is traceable to the isotope dilution-liquid chromatography/tandem mass spectrometry (ID-LC-MS/MS) 25(OH)D Reference Method Procedure (RMP) which is traceable to the National Institute of Standards and Technology Standard Reference Material (SRM) 2972 in accordance with the Vitamin D Standardization Program (VDSP).                                                                                                                                                                                                                                                                                                            |
| 4  | IDS- 25-Hydroxy Vitamin D RIA Immunoassay                |            |            |             |                                                                                                                                                                                                                                                                                                                                                                 |                                                                                                                                                                                                                                                                                                                                                                                                                                                                                                                                                                                                                                                                            |
| 5  | Diasorin LIAISON® 25 OH Vitamin D Total assay            | 4.8-7.7    |            | 8.8-12.5    | 100% for 25(OH)D2<br>100% for 25(OH)D3<br>1.9% for Vitamin D2<br>1.9% for Vitamin D3<br>6.7% for 1,25-(OH)2D2<br>9.3% for 1,25-(OH)2D3<br>1.3% for 3-epi-25(OH)D3                                                                                                                                                                                               | Calibrators and control materials were cleared under k071480. Calibrators are traceable to concentrations determined by UV spectrophotometric analysis of an in-house standard preparation. The standard material used is a commercially available 25-Hydroxyvitamin 0. The stock solution of 25 OH Vitamin 0 is then used to make calibrators by diluting into human serum.                                                                                                                                                                                                                                                                                               |
| 6  | Diasorin (formerly Incstar)-25-Hydroxyvitamin D 125i RIA |            |            |             |                                                                                                                                                                                                                                                                                                                                                                 |                                                                                                                                                                                                                                                                                                                                                                                                                                                                                                                                                                                                                                                                            |

|   |                                                                                                |          |         |          |                                                                                                                                                                                                                                                                                                                                                                                                                                                                                                                                                                                                                                                                                                                                                                                                                                                                                                                                                                                                                                                                                                                                                                                        |                                                                                                                                                                                                                                                                                                     |
|---|------------------------------------------------------------------------------------------------|----------|---------|----------|----------------------------------------------------------------------------------------------------------------------------------------------------------------------------------------------------------------------------------------------------------------------------------------------------------------------------------------------------------------------------------------------------------------------------------------------------------------------------------------------------------------------------------------------------------------------------------------------------------------------------------------------------------------------------------------------------------------------------------------------------------------------------------------------------------------------------------------------------------------------------------------------------------------------------------------------------------------------------------------------------------------------------------------------------------------------------------------------------------------------------------------------------------------------------------------|-----------------------------------------------------------------------------------------------------------------------------------------------------------------------------------------------------------------------------------------------------------------------------------------------------|
| 7 | DIAsource 25OH Vitamin D Total-RIA-CT                                                          | 4,7      | 6.7-5.8 |          | 100% for 25 (OH)D3<br>85% for 25 (OH)D2<br>4.1% for 1,25 (OH)2D3<br>0.2% for 1,25 (OH)2D2<br>Non detectable for Vitamin D3<br>0.1% for Vitamin D2<br>0.4% for 3-epi-25 (OH)D3<br>23% for 24,25 (OH)2D3<br>26.5% for 25,26 (OH)2D3                                                                                                                                                                                                                                                                                                                                                                                                                                                                                                                                                                                                                                                                                                                                                                                                                                                                                                                                                      | The assay is calibrated to the ID-LC-MS/MS reference method developed by Prof. Dr. Linda THIENPONT from the Ghent University in Belgium, as encompassed in the Vitamin D Standardization Program initiative. It shows a high correlation with other commercially available LC-MS/MS and RIA assays. |
| 8 | DIAsource- Total 25OH Vitamin D ELISA                                                          | 2.5-7.8  |         | 4.5-9.4  | 20.3% for 1,25(OH)2D3 (200 ng/mL)<br>1.9% for 1,25(OH)2D2(690 ng/mL )<br>2.9% for Vitamin D3 (200 ng/mL)<br>1.3% for Vitamin D2 (200 ng/mL)<br>>100% for 24,25(OH)2D3 (20 ng/mL)<br>>100% 25,26(OH)2D3 (4 ng/mL)<br>0.07% for 3-epi-25 (OH)D3 (20 µg/mL)<br>100% for 25 (OH)D3 (10 ng/mL)<br>83% for 25 (OH)D2 (10 ng/mL)                                                                                                                                                                                                                                                                                                                                                                                                                                                                                                                                                                                                                                                                                                                                                                                                                                                              | Calibrator values for all six levels have been assigned by using native serum samples that have been assayed by LC/MS-MS. The LC/MS-MS method has been validated against a reference method.                                                                                                        |
| 9 | Access 25(OH) Vitamin D Total Assay for use on the UniCel DxI 9000 Access Immunoassay Analyzer | 2.3-12.1 |         | 4.3-18.6 | Concentration of 25(OH) vitamin D in sample: 20 ng/mL<br>40 ng/mL 100 ng/mL<br>1336% for 1, 25 (OH)2D2(9 ng/mL) at 20 ng/ml<br>1043% for 1, 25 (OH)2D2(9 ng/mL) at 40 ng/ml<br>2262 % for 1, 25 (OH)2D2(9 ng/mL) at 100 ng/ml<br>293% for 1, 25 (OH)2D3 (25 ng/mL) at 20 ng/ml<br>212% for 1, 25 (OH)2D3 (25 ng/mL) at 40 ng/ml<br>324% for 1, 25 (OH)2D3 (25 ng/mL) at 100 ng/ml<br>282% for Paricalcitol (Zemplar) (24 ng/mL) at 20 ng/mL<br>264% for Paricalcitol (Zemplar) (24 ng/mL) at 40 ng/mL<br>288% for Paricalcitol (Zemplar) (24 ng/mL) at 100 ng/mL<br>96% for 25OHD2 (40 ng/mL) at 20 ng/ml<br>99% for 25OHD2(40 ng/mL) at 40 ng/ml<br>116% for 25OHD2(40 ng/mL) at 100 ng/ml<br>64% for 3-epi-25(OH)D3 (100 ng/mL) at 20 ng/mL<br>54% for 3-epi-25(OH)D3 (100 ng/mL) at 40 ng/mL<br>70% for 3-epi-25(OH)D3 (100 ng/mL) at 100 ng/mL<br>9% for 24, 25 (OH)2D3 (104 ng/mL) at 20 ng/ml<br>2% for 24, 25 (OH)2D3 (104 ng/mL) at 40 ng/ml<br>-13% for 24, 25 (OH)2D3 (104 ng/mL) at 100 ng/ml<br>0% for Vitamin D3 (19832 ng/mL) at 20, 40 and 100 ng/ml<br>0% for Vitamin D2 (19232 ng/mL) at 20, 40 and 100 ng/ml<br>0% for 1 (OH)D3 (8013 ng/mL) at 20, 40 and 100 ng/ml | The calibrators are traceable to a Joint Committee for Traceability in Laboratory Medicine (JCTLM) - approved isotope dilution mass spectrometry (ID-LC-MS/MS) reference method procedure (RMP) developed at Ghent University. This RMP is further traceable to the NIST SRM 2972.                  |



|    |                                                                                 |         |  |         |                                                                                                                                                                                                                                                                                                                                                                                                                                                                                                                                                                                                                                                                                                                                                                                                                                                                                                                                                                                                                                                                                                                                                                                                                                    |                                                                                                                                                                                                                                                                                             |
|----|---------------------------------------------------------------------------------|---------|--|---------|------------------------------------------------------------------------------------------------------------------------------------------------------------------------------------------------------------------------------------------------------------------------------------------------------------------------------------------------------------------------------------------------------------------------------------------------------------------------------------------------------------------------------------------------------------------------------------------------------------------------------------------------------------------------------------------------------------------------------------------------------------------------------------------------------------------------------------------------------------------------------------------------------------------------------------------------------------------------------------------------------------------------------------------------------------------------------------------------------------------------------------------------------------------------------------------------------------------------------------|---------------------------------------------------------------------------------------------------------------------------------------------------------------------------------------------------------------------------------------------------------------------------------------------|
| 10 | Access 25 (OH) Vitamin D<br>Total for use on the Access<br>2 Immunoassay System | 1.5-3.8 |  | 6.8-7.7 | <p>Concentration of 25(OH) vitamin D in sample: 20 ng/mL<br/>40 ng/mL 100 ng/mL;</p> <p>1336% for 1, 25 (OH)2D2(9 ng/mL) at 20 ng/ml<br/>1043% for 1, 25 (OH)2D2(9 ng/mL) at 40 ng/ml<br/>2262 % for 1, 25 (OH)2D2(9 ng/mL) at 100 ng/ml<br/>293% for 1, 25 (OH)2D3 (25 ng/mL) at 20 ng/ml<br/>212% for 1, 25 (OH)2D3 (25 ng/mL) at 40 ng/ml<br/>324% for 1, 25 (OH)2D3 (25 ng/mL) at 100 ng/ml<br/>282% for Paricalcitol (Zemplar) (24 ng/mL) at 20 ng/mL<br/>264% for Paricalcitol (Zemplar) (24 ng/mL) at 40 ng/mL<br/>288% for Paricalcitol (Zemplar) (24 ng/mL) at 100 ng/mL<br/>96% for 25OHD2 (40 ng/mL) at 20 ng/ml<br/>99% for 25OHD2(40 ng/mL) at 40 ng/ml<br/>116% for 25OHD2(40 ng/mL) at 100 ng/ml<br/>64% for 3-epi-25(OH)D3 (100 ng/mL) at 20 ng/mL<br/>54% for 3-epi-25(OH)D3 (100 ng/mL) at 40 ng/mL<br/>70% for 3-epi-25(OH)D3 (100 ng/mL) at 100 ng/mL<br/>9% for 24, 25 (OH)2D3 (104 ng/mL) at 20 ng/ml<br/>2% for 24, 25 (OH)2D3 (104 ng/mL) at 40 ng/ml<br/>-13% for 24, 25 (OH)2D3 (104 ng/mL) at 100 ng/ml</p> <p>0% for Vitamin D3 (19832 ng/mL) at 20, 40 and 100<br/>ng/ml<br/>0% for Vitamin D2 (19232 ng/mL) at 20, 40 and 100<br/>ng/ml<br/>0% for 1 (OH)D3 (8013 ng/mL) at 20, 40 and 100 ng/ml</p> | The calibrators are traceable to a Joint Committee for Traceability in Laboratory<br>Medicine (JCTLM) - approved isotope dilution mass spectrometry (ID-LC-MS/MS)<br>reference method procedure (RMP) developed at Ghent University. This RMP is<br>further traceable to the NIST SRM 2972. |
| 11 | ARCHITECT 25-OH<br>Vitamin D assay                                              | 1.4-3.7 |  | 2.6-4.6 | <p>102% for 25-(OH)D3 (100 ng/mL)<br/>0% for Vitamin-D2 (1000 ng/mL)<br/>0.3% for Vitamin-D3 (1000 ng/mL)<br/>114% for 24,25-(OH)2 Vitamin D3(20 ng/mL)<br/>11.5% for 1,25-(OH)2 Vitamin D3 (100 ng/mL)<br/>3.1% for 3-epi 25-(OH)D3(100 ng/mL) 1.7% for<br/>Paricalcitol (Zemplar) (24 ng/mL)</p>                                                                                                                                                                                                                                                                                                                                                                                                                                                                                                                                                                                                                                                                                                                                                                                                                                                                                                                                 | The ARCHITECT 25-OH Vitamin D is traceable to a manufacturer's internal<br>standard (Primary Calibrator), which is anchored against Absorbance at 264<br>nm.                                                                                                                                |

|    |                                    |         |  |          |                                                                                                                                                                                                                                                                                                                                                                                                                                                                                            |                                                                                                                                                                                                                                                                            |
|----|------------------------------------|---------|--|----------|--------------------------------------------------------------------------------------------------------------------------------------------------------------------------------------------------------------------------------------------------------------------------------------------------------------------------------------------------------------------------------------------------------------------------------------------------------------------------------------------|----------------------------------------------------------------------------------------------------------------------------------------------------------------------------------------------------------------------------------------------------------------------------|
| 12 | ARCHITECT 25-OH Vitamin D 5P02     | 1.9-4.5 |  | 3.1-6.9  | Cross-reactivity across the three analyte levels (20 ng/mL, 30 ng/mL, and 40 ng/mL);<br>0.8% for Vitamin D3 (100 ng/mL)<br>0.4% for Vitamin D2 (100 ng/mL)<br>1.3% for C-3-epimer- of 25-(OH)D3 (OHD3) (100 ng/mL)<br>0.8% for C-3-epimer- of 25-(OH)D2 (OHD2) (100 ng/mL)<br>0.1% for 1,25-(OH)2D3 (100 ng/mL)<br>-0.4% for 1,25-(OH)2D2(100 ng/mL)<br>101.9-189.2% for 24,25-(OH)2D3 (20 ng/mL)<br>71.4-114.2% for 24,25-(OH)2D2(20 ng/mL)<br>0.6% for Paricalcitol (Zemplar) (24 ng/mL) | The ARCHITECT 25-OH Vitamin D assay is standardized against NIST SRM 2972 (National Institute of Standards & Technology Standard Reference Material 2972)                                                                                                                  |
| 13 | Cobas Elecsys® Vitamin D total III | 2.9-9.6 |  | 3.2-10.0 | Normalized cross reactivity at 25-hydroxyvitamin D concentrations (25, 40 and 60 ng/mL);<br>100% for 25 (OH)D3 (50 ng/mL)<br>103.3% for 25 (OH)D2 (50 ng/mL)<br>8.1% for 24,25 (OH)2D3 (100 ng/mL)<br>121.6% for 3-epi-25 (OH)D3 (50 ng/mL)<br>102.7% for 3-epi-25 (OH)D2 (50 ng/mL)<br>0.9% for Vitamin D3 (1000 ng/mL)<br>0.7% for Vitamin D2 (1000 ng/mL)<br>None detected % for 1,25 (OH)2D3 (100 ng/mL)<br>0.9% for 1,25 (OH)2D2 (100 ng/mL)                                          | The device has been standardized using internal standards which are traceable to the ID-LC-MS/MS 25-hydroxyvitamin D Reference Measurement Procedure. The ID-LC-MS/MS is traceable to the National Institute of Standards and Technology Standard Reference Material 2972. |

|    |                                                        |           |  |           |                                                                                                                                                                                                                                                                                                                                                                                                                                                                                                                                                                                                                                                                                                                                                                                                                                                                                                                                                                                                          |                                                                                                                                                                                                                                     |
|----|--------------------------------------------------------|-----------|--|-----------|----------------------------------------------------------------------------------------------------------------------------------------------------------------------------------------------------------------------------------------------------------------------------------------------------------------------------------------------------------------------------------------------------------------------------------------------------------------------------------------------------------------------------------------------------------------------------------------------------------------------------------------------------------------------------------------------------------------------------------------------------------------------------------------------------------------------------------------------------------------------------------------------------------------------------------------------------------------------------------------------------------|-------------------------------------------------------------------------------------------------------------------------------------------------------------------------------------------------------------------------------------|
| 14 | Siemens Dimension EXL<br>LOCI Vitamin D Total<br>Assay | 1.8-5.6   |  | 4.1-8.7   | <p>Cross reactivity at 25-hydroxyvitamin D concentrations (26.5-28.8 ng/mL);</p> <p>0.1% for Vitamin D2 (1000 ng/mL)</p> <p>-0.1% for Vitamin D3 (1000 ng/mL)</p> <p>151.9% for 1,25 (OH)2D2 (0.5 ng/mL)</p> <p>1.7% for 1,25 (OH)2D3 (0.5 ng/mL)</p> <p>3.9% for 3-epi-25 (OH)D3 (100 ng/mL)</p> <p>93.8% for Paricalcitol (24 ng/mL)</p> <p>0.1% for 1 (OH)D3 (3000 ng/mL)</p> <p>2.5% for 24,25 (OH)D3 (60 ng/mL)</p> <p>95.1% for 25 (OH)D2 (30 ng/mL)</p> <p>88.6% for 25 (OH)D3 (30 ng/mL)</p> <p>Cross reactivity at 25-hydroxyvitamin D concentrations (129-136.8 ng/mL);</p> <p>-0.1% for Vitamin D2 (1000 ng/mL)</p> <p>0.1% for Vitamin D3 (1000 ng/mL)</p> <p>1.3% for 1,25 (OH)2D2 (0.5 ng/mL)</p> <p>-224.5% for 1,25 (OH)2D3 (0.5 ng/mL)</p> <p>2.5% for 3-epi-25 (OH)D3 (100 ng/mL)</p> <p>70.8% for Paricalcitol (24 ng/mL)</p> <p>0% for 1 (OH)D3 (3000 ng/mL)</p> <p>1.2% for 24,25 (OH)D3 (60 ng/mL)</p> <p>94.1% for 25 (OH)D2 (30 ng/mL)</p> <p>90.1% for 25 (OH)D3 (30 ng/mL)</p> | Standardized using internal standards traceable by method correlation to Ghent University's IDLC-MS/MS 25 OH vitamin D Reference Method Procedure (RMP) which is traceable to NIST SRM 2972.                                        |
| 15 | Siemens Advia Centaur<br>Vitamin D Total Assay         | 2.7-7.0   |  | 4.8-11.1  | <p>Cross reactivity at 25-hydroxyvitamin D concentrations (35, 55 and 115 ng/mL);</p> <p>0.5% for Vitamin D2 (1000 ng/mL)</p> <p>0.3% for Vitamin D3 (1000 ng/mL)</p> <p>104.5% for 25 (OH)D2 (30 ng/mL)</p> <p>100.7% for 25 (OH)D3 (30 ng/mL)</p> <p>4.0% for 1,25 (OH)2D2 (30 ng/mL)</p> <p>1.0% for 1,25 (OH)2D3 (30 ng/mL)</p> <p>1.1% for 3-epi-25 (OH)D3 (100 ng/mL)</p> <p>0.1% for Paricalcitol (24 ng/mL)</p>                                                                                                                                                                                                                                                                                                                                                                                                                                                                                                                                                                                  | The ADVIA Centaur Master Curve Materials (MCM) are traceable to internal standards, which are traceable to LC-MS/MS. The internal standards were value assigned via method correlation using clinical samples with LC/MS/MS values. |
| 16 | Siemens Atellica IM<br>Vitamin D Total Assay           |           |  |           |                                                                                                                                                                                                                                                                                                                                                                                                                                                                                                                                                                                                                                                                                                                                                                                                                                                                                                                                                                                                          | Traceable to the IDLC/MS/MS 25 (OH) vitamin D Reference Measurement Procedure                                                                                                                                                       |
| 17 | Maglumi 2000 25-Oh<br>Vitamin D                        | 1.45-5.04 |  | 2.98-9.23 | <p>Cross reactivity at 25-hydroxyvitamin D concentrations (30 and 60 ng/mL);</p> <p>98.10% for 25-(OH)D2</p> <p>96.13% for 25-(OH)D3</p> <p>1.04% for Vitamin D2</p> <p>1.98% for Vitamin D3</p> <p>8.12% for 1,25-(OH)2D3</p> <p>8.77% for 1,25-(OH)2D2</p> <p>2.04% for 3-epi-25OH D3</p>                                                                                                                                                                                                                                                                                                                                                                                                                                                                                                                                                                                                                                                                                                              | ID-LC-MS/MS traceable to NIST RMP 2972                                                                                                                                                                                              |

|    |                                                                    |        |     |          |                                                                                                                                                                    |  |
|----|--------------------------------------------------------------------|--------|-----|----------|--------------------------------------------------------------------------------------------------------------------------------------------------------------------|--|
| 18 | Nichols Advantage 25-Hydroxyvitamin D                              | 3.0-45 |     | 6.4-14.5 | 1.6% for Vitamin D2<br>1.4% for Vitamin D3<br>100% for 25-(OH)D2<br>100% for 25-(OH)D3<br>100% for 24,25-(OH)2D3<br>39% for 25,26-(OH)2D3<br>1.1% for 1,25-(OH)2D3 |  |
| 19 | Sunlong Biotech- Human 25- hydroxy vitaminD3(25-OH-D3) ELISA       | <10    | <12 |          |                                                                                                                                                                    |  |
| 20 | MassChrom® 25-OHD3/D2 in Serum/Plasma - LC-MS/MS                   |        |     |          |                                                                                                                                                                    |  |
| 21 | MassChrom® 25-OHD3/D2 and 3-epi-25-OHD3 in Serum/Plasma - LC-MS/MS |        |     |          |                                                                                                                                                                    |  |
